# Supplementary material for: Application of Quantitative Computed Tomographic Perfusion in the Prognostic Assessment of Patients with Aneurysmal Subarachnoid Hemorrhage Coexistent Intracranial Atherosclerotic Stenosis
Source: MDPI journal article supplement (doi:10.3390/brainsci13040625), 2023-04-06
Supplement: s1 [file s1]

Supplementary Table S1. Comparisons of baseline characteristics of included and excluded patients with aneurysmal subarachnoid hemorrhage and internal carotid artery stenosis.

| Characteristics             | Patients with CTP<br>(Included) | Patients without CTP<br>(Excluded) | P value |
|-----------------------------|---------------------------------|------------------------------------|---------|
| Sample size                 | 192                             | 41                                 |         |
| Age, yrs, mean $\pm$ SD     | 59.34 $\pm$ 10.77               | 59.73 $\pm$ 11.45                  | 0.836   |
| Female sex                  | 110 (57.3)                      | 24 (58.5)                          | 0.884   |
| Prior medical history       |                                 |                                    |         |
| Smoking                     | 29 (15.1)                       | 17 (41.5)                          | <0.001  |
| Drinking                    | 15 (7.8)                        | 8 (19.5)                           | 0.023   |
| Hypertension                | 113 (58.9)                      | 30 (73.2)                          | 0.087   |
| Hyperlipidemia              | 10 (5.2)                        | 4 (9.8)                            | 0.266   |
| Diabetes mellitus           | 16 (8.3)                        | 5 (12.2)                           | 0.443   |
| Heart disease               | 23 (12.0)                       | 6 (14.6)                           | 0.640   |
| Prior infarction            | 15 (7.8)                        | 10 (24.4)                          | 0.002   |
| Aneurysm characteristics    |                                 |                                    |         |
| Posterior circulation       | 27 (14.1)                       | 6 (14.6)                           | 0.934   |
| Early seizures              |                                 |                                    |         |
| Early loss of consciousness |                                 |                                    |         |
| Acute hydrocephalus         | 83 (43.2)                       | 13 (31.7)                          | 0.174   |
| Parent artery stenosis      | 88 (45.8)                       | 22 (53.7)                          | 0.362   |
| Neurological score          |                                 |                                    |         |
| H-H grade 4-5               | 35(18.2)                        | 6 (14.6)                           | 0.583   |
| WFNS grade 4-5              | 59 (30.7)                       | 10 (24.4)                          | 0.420   |
| mFS grade 3-4               | 130 (67.7)                      | 24 (58.5)                          | 0.260   |
| Graeb score 5-12            | 21 (10.9)                       | 6 (14.6)                           | 0.502   |
| SEBES score 3-4             | 79 (41.1)                       | 15 (36.6)                          | 0.589   |
| Treatment modality          |                                 |                                    | 0.466   |
| Surgical clipping           | 101 (52.6)                      | 19 (46.3)                          |         |
| Endovascular treatment      | 91 (47.4)                       | 22 (53.7)                          |         |
| In-hospital complications   |                                 |                                    |         |
| Delayed cerebral ischemia   | 67 (34.9)                       | 15 (36.6)                          | 0.837   |
| Hypoproteinemia             | 64 (33.3)                       | 9 (22.0)                           | 0.154   |
| Stress ulcers bleeding      | 37 (19.3)                       | 8 (19.5)                           | 0.972   |
| Anemia                      | 78 (40.6)                       | 13 (31.7)                          | 0.288   |
| Deep venous thrombosis      | 23 (12.0)                       | 4 (9.8)                            | 0.686   |
| Pneumonia                   | 91 (47.4)                       | 18 (43.9)                          | 0.684   |

Abbreviations: CTP, computed tomography perfusion; DCI, delayed cerebral ischemia; H-H, Hunt and Hess; mFS, modified Fisher Scale; SD, standard deviation; SEBES, Subarachnoid hemorrhage Early Brain Edema Score; WFNS, World Federation of Neurosurgical Societies.

Supplementary Table S2. The Sensitivity, Specificity, Accuracy, Positive Predictive Value (PPV), and Negative Predictive Value (NPV) of different models.

| Model     | Sensitivity | Specificity | Accuracy | PPV   | NPV    |
|-----------|-------------|-------------|----------|-------|--------|
| SAHIT     | 0.913       | 0.381       | 0.797    | 0.840 | 0.5512 |
| SAHIT+CTP | 0.940       | 0.452       | 0.833    | 0.860 | 0.679  |
| TAPS      | 0.907       | 0.429       | 0.802    | 0.850 | 0.563  |
| TAPS+CTP  | 0.933       | 0.429       | 0.823    | 0.854 | 0.643  |

Abbreviations: CTP, Computed Tomography Perfusion; SAHIT, Subarachnoid Hemorrhage International Trialists; TAPS, Tiantan Aneurysmal Subarachnoid Hemorrhage Prognostic Scoring System.

Supplementary Table S3. The Performance of different models after the random under-sampling procedure.

| Model     | AUC (95%CI)         | Sensitivity | Specificity | Accuracy | PPV   | NPV   |
|-----------|---------------------|-------------|-------------|----------|-------|-------|
| SAHIT     | 0.777 (0.702-0.852) | 0.720       | 0.762       | 0.729    | 0.915 | 0.432 |
| SAHIT+CTP | 0.779 (0.699-0.860) | 0.740       | 0.667       | 0.724    | 0.888 | 0.418 |
| TAPS      | 0.700 (0.608-0.791) | 0.747       | 0.643       | 0.724    | 0.882 | 0.415 |
| TAPS+CTP  | 0.701 (0.604-0.798) | 0.693       | 0.738       | 0.703    | 0.904 | 0.403 |

Abbreviations: AUC, area under the curve; CTP, computed tomography perfusion; NPV, negative predictive value; PPV, positive predictive value; SAHIT, Subarachnoid Hemorrhage International Trialists; TAPS, Tiantan Aneurysmal Subarachnoid Hemorrhage Prognostic Scoring System.
